# Supplementary material for: Human alveolar macrophages display marked hypo-responsiveness to IFN-γ in both proteomic and gene expression analysis
Source: PubMed Central journal article supplement (PMC10833554; doi:10.1371/journal.pone.0295312), 2024-02-01
Supplement: pone.0295312.s004.pdf [file pone.0295312.s004.pdf]

10/22/19  
NO91 BAL  
GAPDH

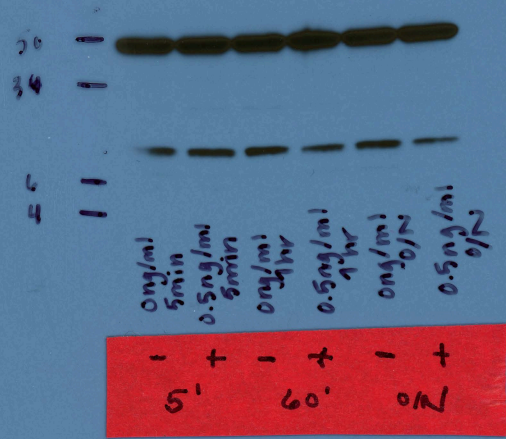

NO91 10/11/19  
BAL GAPDH  
rep blot and ● Fig 5

10/22/19  
NO91 BAL  
PSTAT

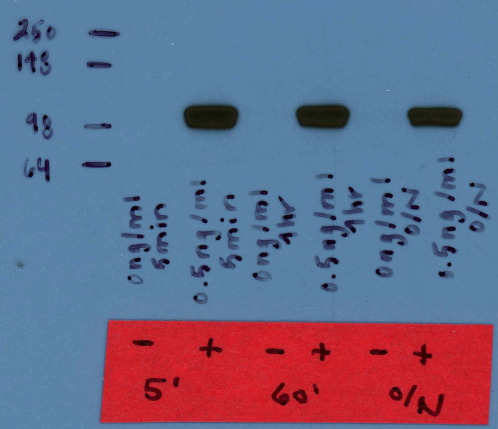

NO91 10/17/19  
BAL P-STAT1  
representative blot A • fig 5c

NO91  
BAL

SOCS2  
10/24/19

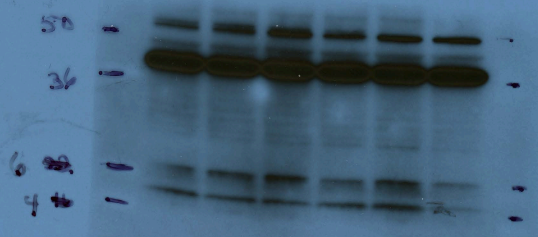

- + - + - +  
5' 60' o/N

NO91 10/17/19  
BAL SOCS2  
representative blot and o/N

No9: TSTAT2  
BAL 10/24/19

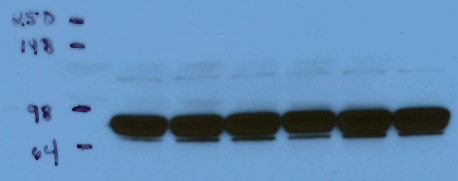

- + - + - +  
5' 60' 0/N

No9: 10/17/19  
BAL TSTAT2  
rep blot & Fig 5b

10/29/19  
N091 MN  
GAPDH

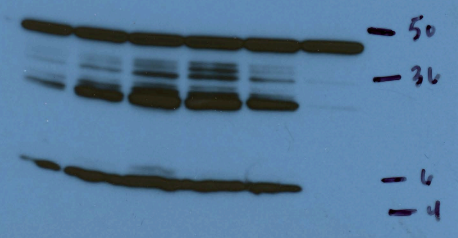

- + - + - +  
5' 60' 0/N

N091 10/17/19  
MN GAPDH  
rep blot and fig 5

10/29/19  
N091 MN  
PSTAT

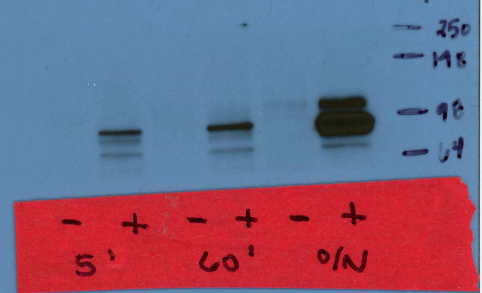

N091 10/17/19  
MN P-STAT1  
rep blot of fig 5c

10/31/19  
N091 MN  
SOCS2

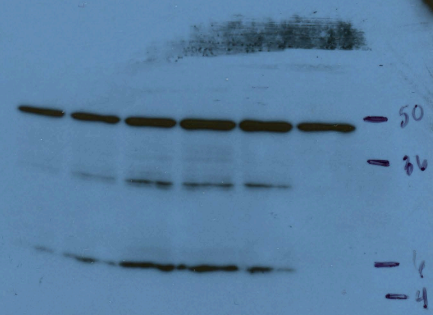

- + - + - +  
5' 60' 0/N

N091 10/17/19  
MN SOCS2  
rep blot? and • fig 5d

10/31/19  
NO91 MN  
TSTAT

— 250  
— 148  
— 98  
— 64

- + - + - +  
5' 60' 01N

NO91 10/17/19  
MN STAT2  
representative blot & fig 5b



1/29/19  
NO91  
Overnight

PSTAT

X X X X

250 -  
178 -  
98 -  
64 -

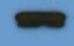

\*

GAPDH

50 -  
36 -  
6 -  
4 -

MN MN AM AM  
- + - +

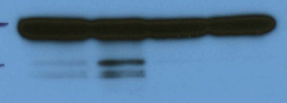

NO91 1/29/19  
BAL + MN  
GAPDH Fig 5a denominator \*

IFNGR.  
2/22/19

NO91

N173

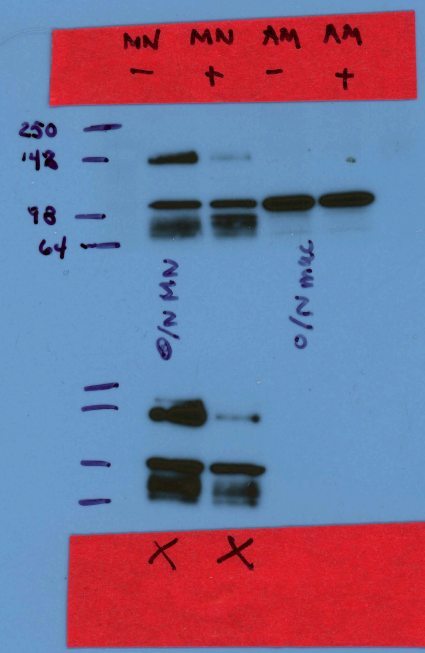

NO91 2/22/19  
BAL + MN  
IFNGR1 Fig 5a \*

10/25/16

\*  
GAPDH

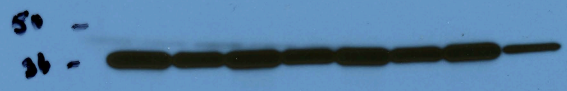

|    |    |   |   |   |   |    |    |
|----|----|---|---|---|---|----|----|
| 1  | 2  | x | x | x | x | 7  | 8  |
| MV | AM |   |   |   |   | MV | AM |
| -  | -  |   |   |   |   | +  | +  |

N158 10/23/18  
 BAL + MV  
 GAPDH Fig 5a • denominator

10/26/18

|    |    |    |    |
|----|----|----|----|
| 1  | 2  | 7  | 8  |
| MN | AM | MN | AM |
| -  | -  | +  | +  |
|    | X  | X  | X  |

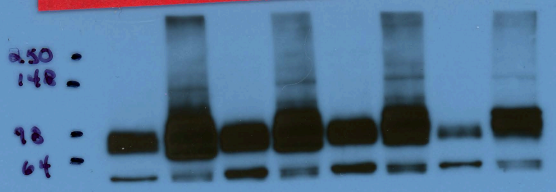

IFNGR1

JCSA

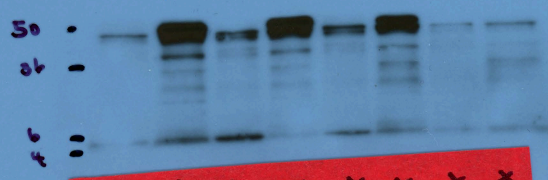

|   |   |   |   |   |   |   |   |
|---|---|---|---|---|---|---|---|
| X | X | X | X | X | X | X | X |
|---|---|---|---|---|---|---|---|

N158 10/23/18  
 BAL + MN  
 IFNGR1 Fig 5a •

2-20-20  
N173  
GAPDH

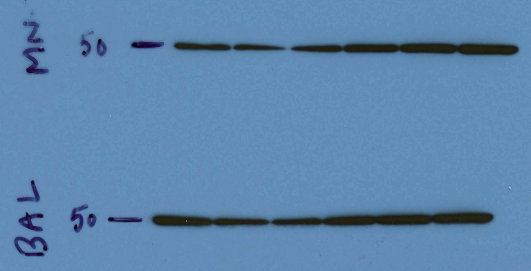

- + - + - +  
5' 60' 0/N

N173 01/06/20  
BAL + MN  
GAPDH Fig 5 denominator

2-20-20  
N173  
PSTAT

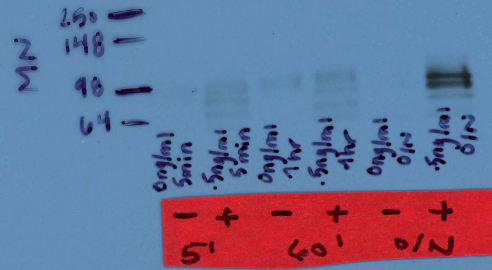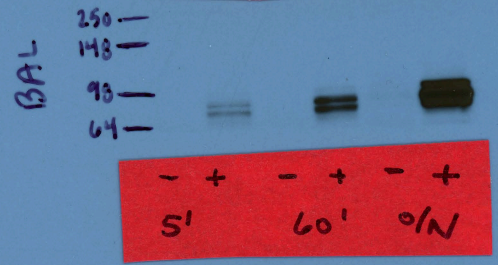

N173 01/06/20  
BAL + MN  
PSTAT fig 5c ■

2-20-20  
N173  
SOCS1

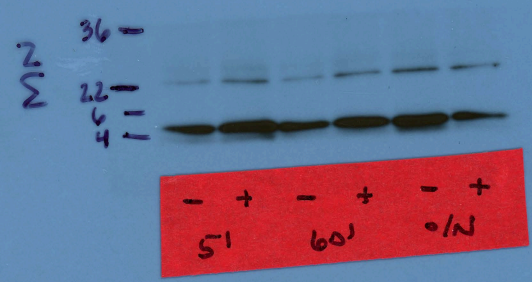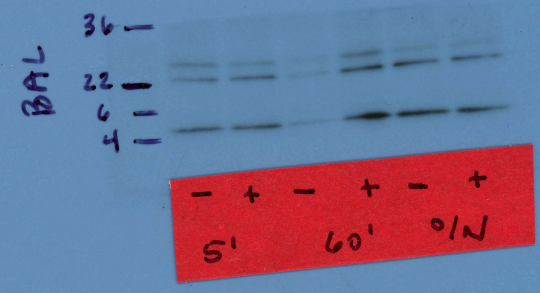

N173 0/04/20  
BAL + MN  
SOCS1 Fig 5d

2-21-20  
N173  
TSTAT

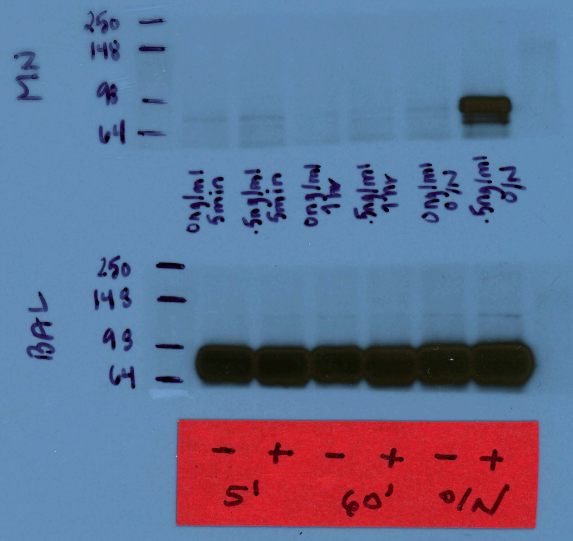

N173 01/06/20  
BAL + MN  
STAT1 Fig 5b



10/25/18

\*  
GAPDH

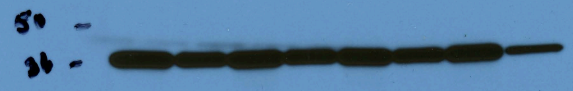

|    |    |   |   |   |   |    |    |
|----|----|---|---|---|---|----|----|
| 1  | 2  | X | X | X | X | 7  | 8  |
| MV | AM |   |   |   |   | MV | AM |
| -  | -  |   |   |   |   | +  | +  |

N173 10/23/18  
 BAL + MV ✓  
 GAPDH Fig 5a • denominator

10/25/18

|    |    |   |   |   |    |    |
|----|----|---|---|---|----|----|
| 1  | 2  |   |   |   | 7  | 8  |
| MN | AM | X | X | X | MN | AM |
| -  | -  |   |   |   | +  | +  |

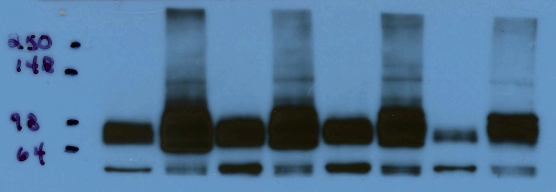

IFNGR1

BAL

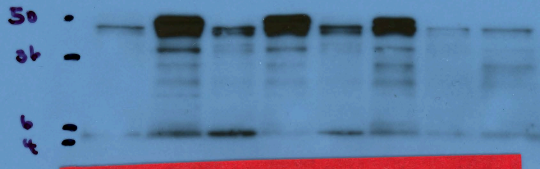

|   |   |   |   |   |   |   |   |
|---|---|---|---|---|---|---|---|
| X | X | X | X | X | X | X | X |
|---|---|---|---|---|---|---|---|

N173 10/28/18  
 BAL + MN  
 IFNGR1 Fig 5a •

1-22-20  
N175  
GAPDH

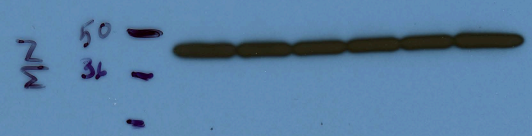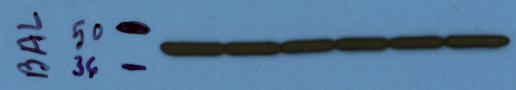

N175 01/08/20  
BAL + MN  
GAPDH Fig5 denominator ▲

1-22-20  
N175  
P-STAT

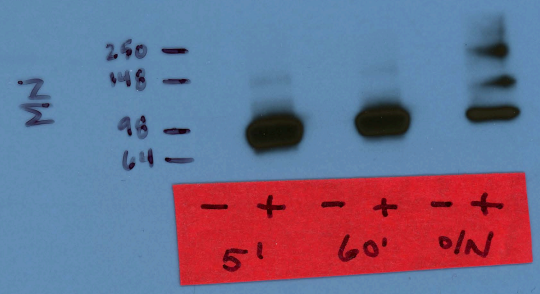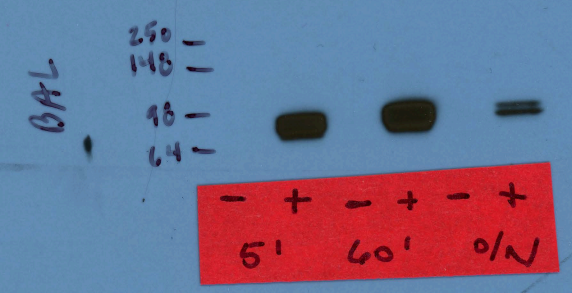

N175 01/22/20  
BAL + MN  
P-STAT1 Fy5C ▲

1-22-20  
N175  
Soc51

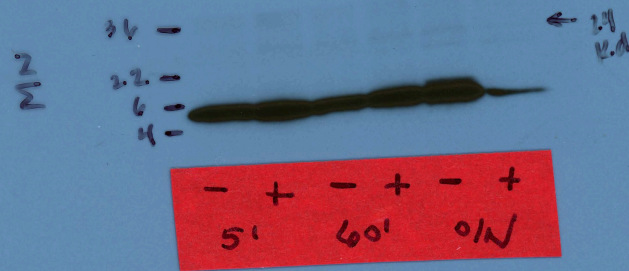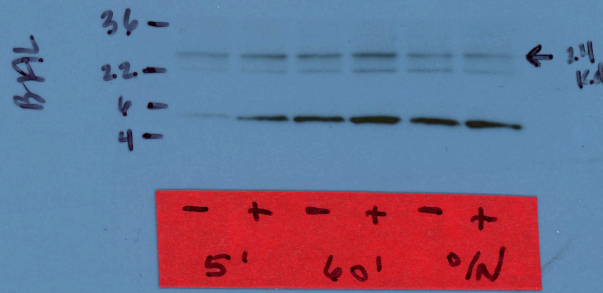

N175 01/22/20  
BAL + MN  
Soc51 Fig 5d ▲

1-28-20  
N175  
T STAT

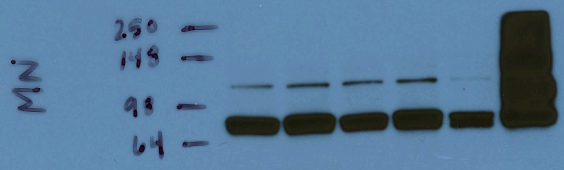

- + - + - +  
5' 60' 0/N

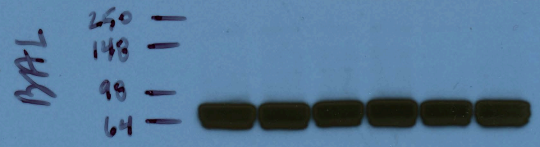

- + - + - +  
5' 60' 0/N

N175 01/28/20  
BAL + MN  
STAT1 Fig 5b ▲

2/15/19

N178

X X X X X X

PS1A

250  
148  
98  
64

AM AM MN MN  
X X - + - +

GAPDH

50  
36  
6  
4

N178 02/12/19  
BAL+MN  
GAPDH Fig 5a

02/12/19

~~XXXX~~

XX AM AM MN MN  
- + - +

N178 unsp. gk

85 -  
48 -  
70 -  
64 -

XX

50 -  
36 -  
6 -  
4 -

DOCS1  
N173

MN MN  
- o/N

N178 02/12/19  
BAL + MN  
IFNGR1 Fig 5a



911 (0.1)

3/21/19  
N179  
GAPDH

N179  
MN

N179  
MN

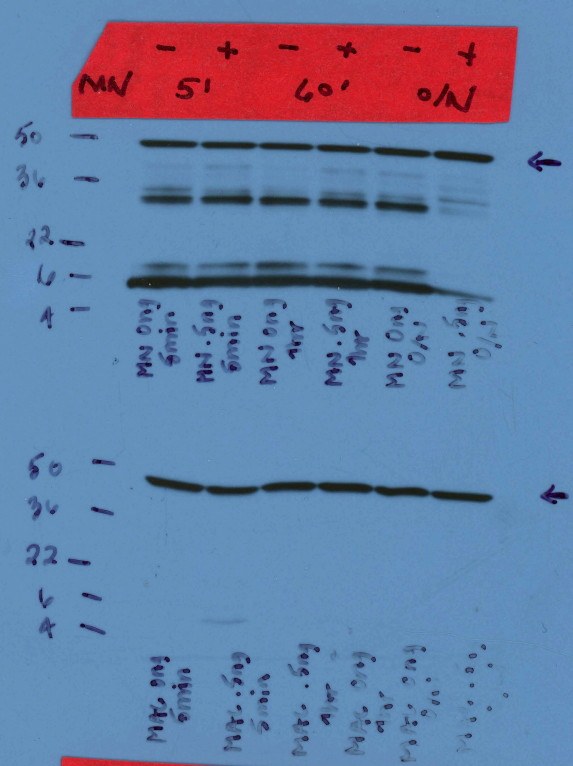

N179 03/21/19  
BAL + MN  
GAPDH Fig. 5 denominator\*

1st exp.  
Rats

9/9/19  
PSTAT  
N179

MN N179

MN - + - + - +  
5' 60' 0/N

250  
143  
98  
64

MN 0ng 5min  
MN 5ng 5min  
MN 0ng 1hr  
MN 5ng 1hr  
MN 0ng 0/N  
MN 5ng 0/N

MACS N179

250  
143  
98  
64

MAC 0ng 5min  
MAC 5ng 5min  
MAC 0ng 1hr  
MAC 5ng 1hr  
MAC 0ng 0/N  
MAC 5ng 0/N

BAL  
- + - + - +  
5' 60' 0/N

N179 03/21/19  
BAL + MN  
P-STAT1 Fig 5C \*

4/24/19  
N179  
Sec 5.1

MN  
- + - + - +  
5' 60' 0/N

MN N179

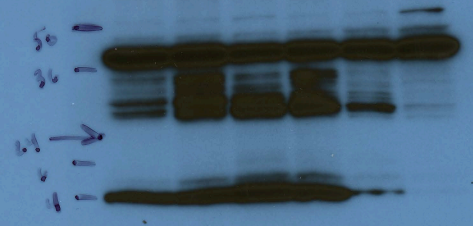

MNS N179

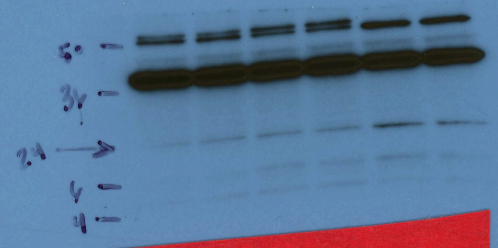

BAL  
- + - + - +  
5' 60' 0/N

N179 03/21/19  
BAL + MN  
Sec 5.2 Fig 5d \*

11-28

3/28/19

N179  
STAT

N179  
MN

250  
175  
90  
64

MN  
- 5' + - 60' + - 0/N +

250  
175  
90  
64

N179  
MAC

BAL  
- 5' + - 60' + - 0/N +

N179 03/21/19  
BAL + MN  
STAT2 Fig 5b \*
